# Supplementary material
Source: Springer Nature journal article supplement (https://www.springermedizin.de/resource/supplementary/40164_2012_10_MOESM5_ESM.pdf/9687008)
Supplement: MOESM5 [file 9687008]

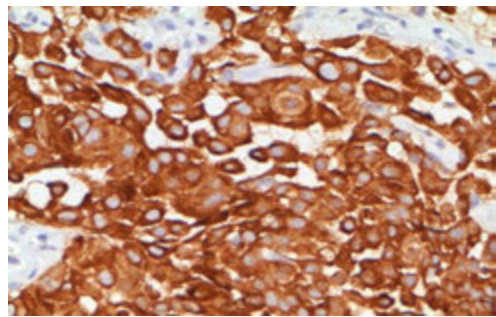

Bladder- CK7 Immunohistochemical staining of invading tumor cells 40x

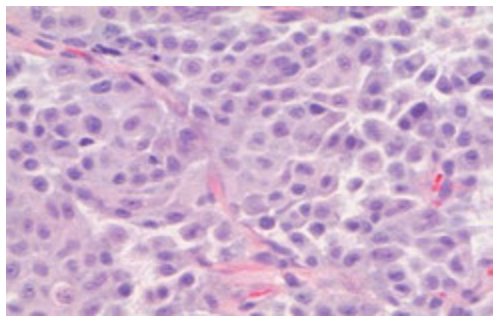

Bladder- H & E stained invading tumor cells 40x

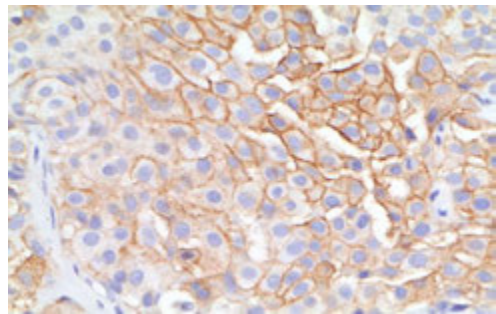

Bladder- CD 138 staining of tumor cells 40x

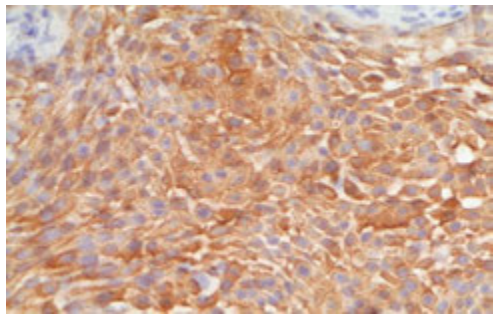

High Molecular Weight Keratin (HMWK) staining of tumor cells 40 x
